# Supplementary material
Source: PubMed Central journal article supplement (PMC4485443)

# Smad2 MH2 Smad4 MH2

## Human to vertebrate differences

## Human polymorphisms

## Tumor mutations

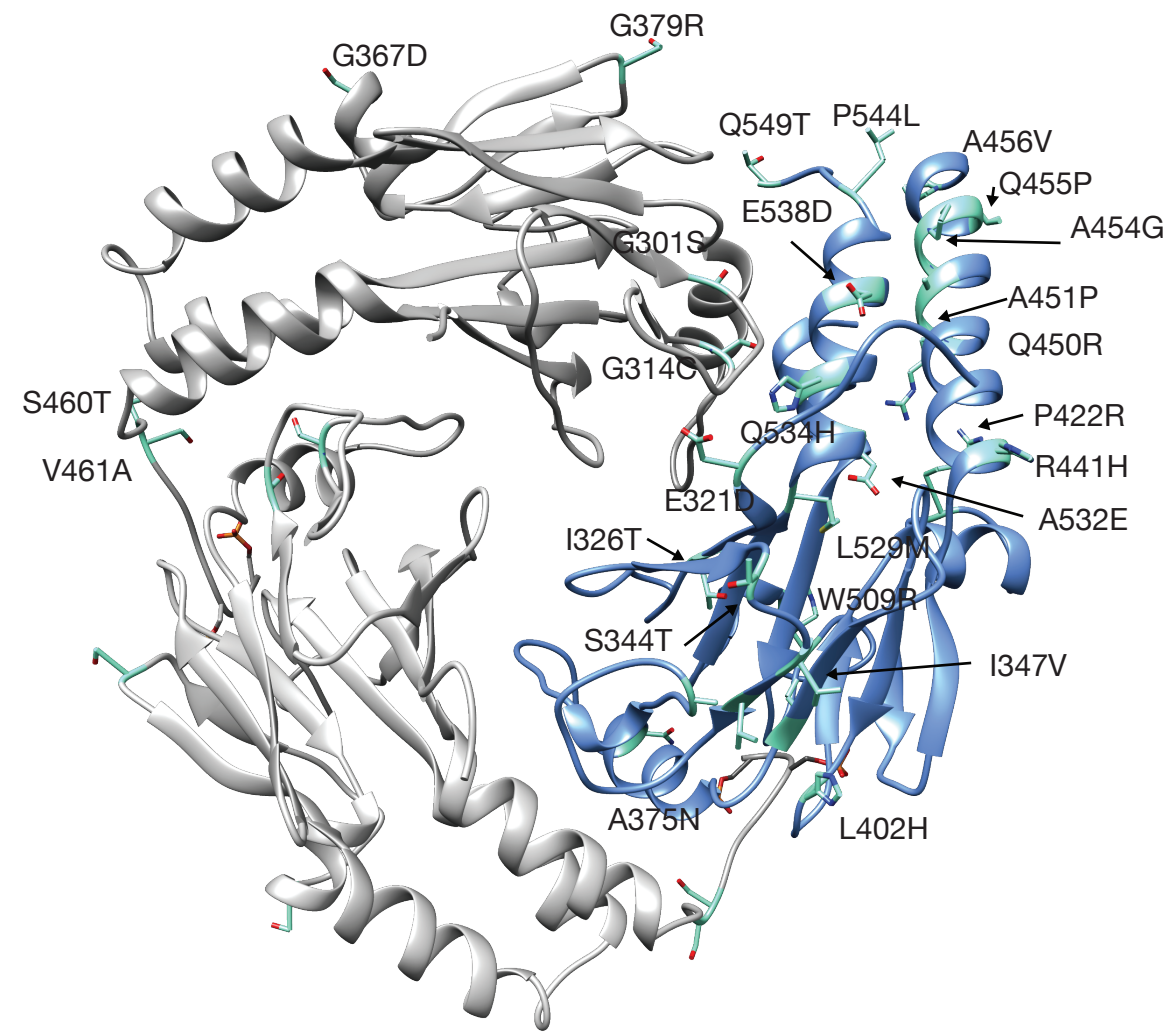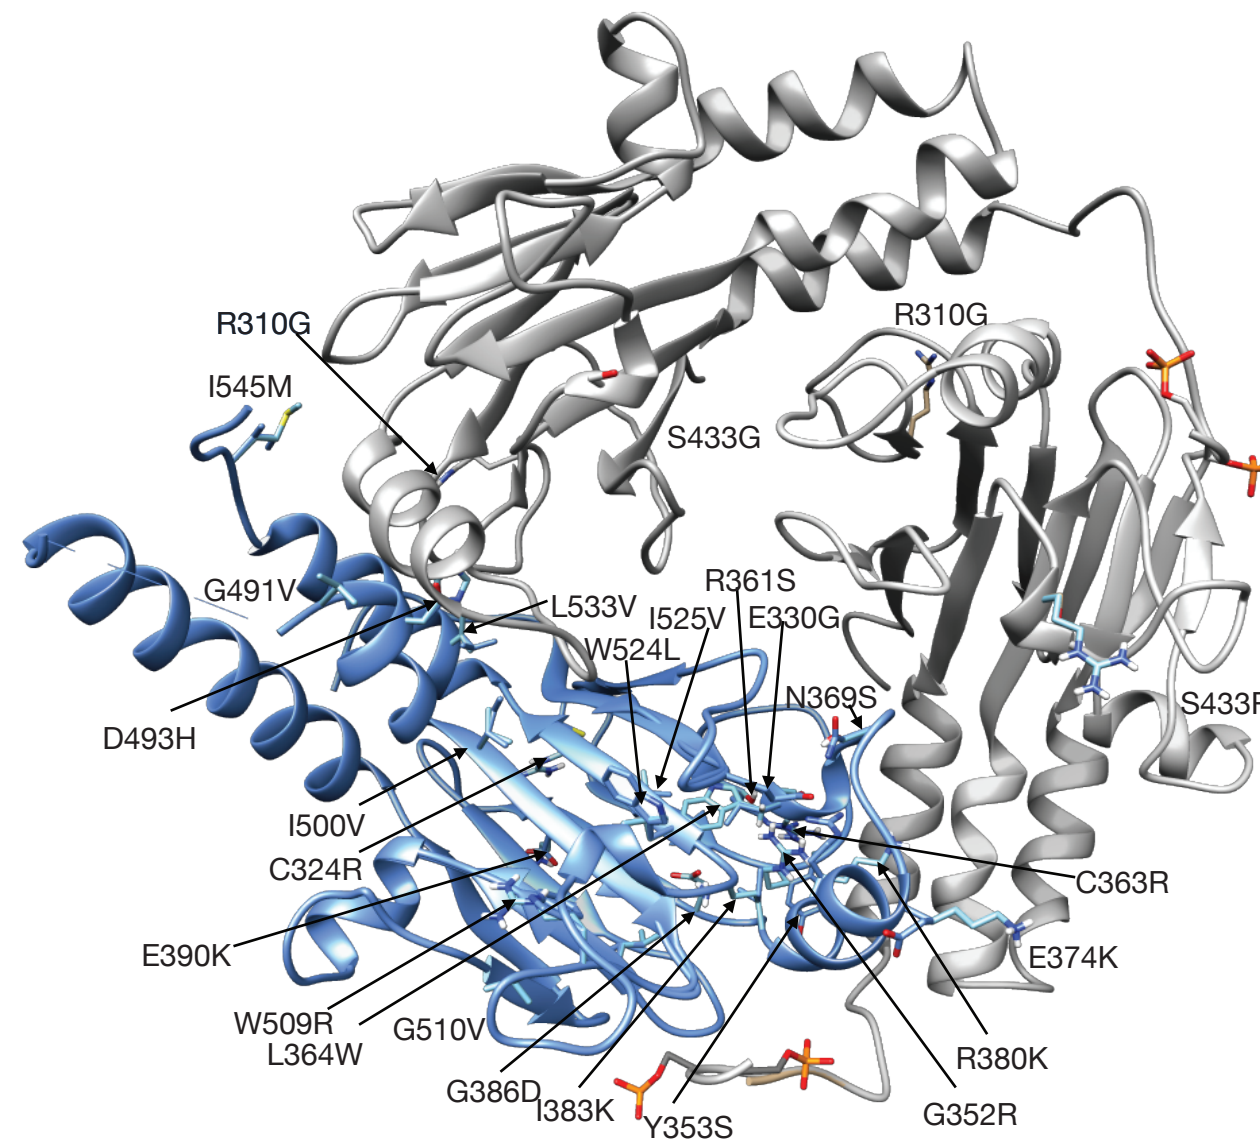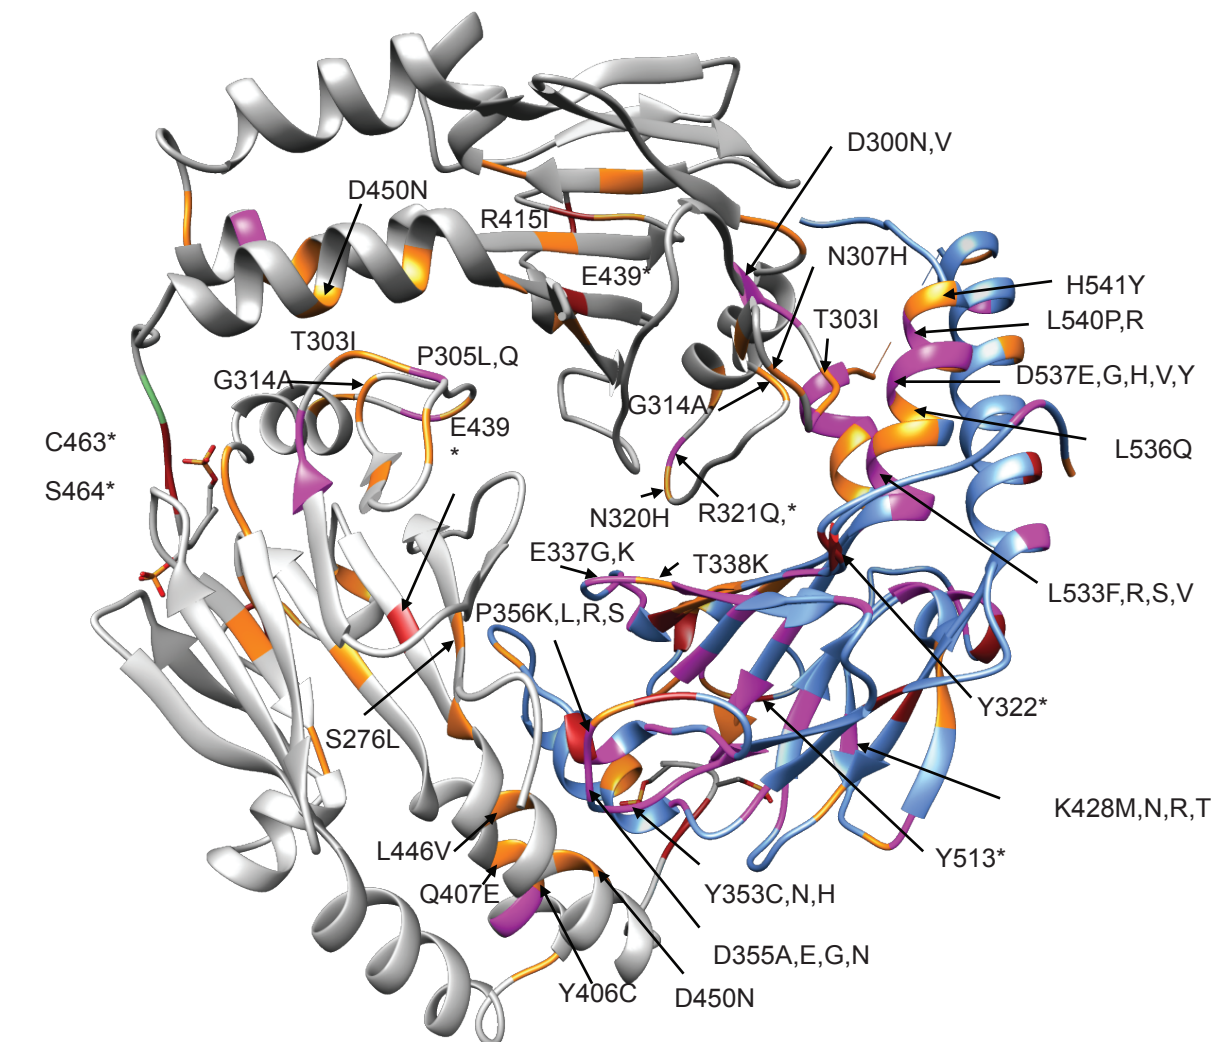

Smad2 MH2

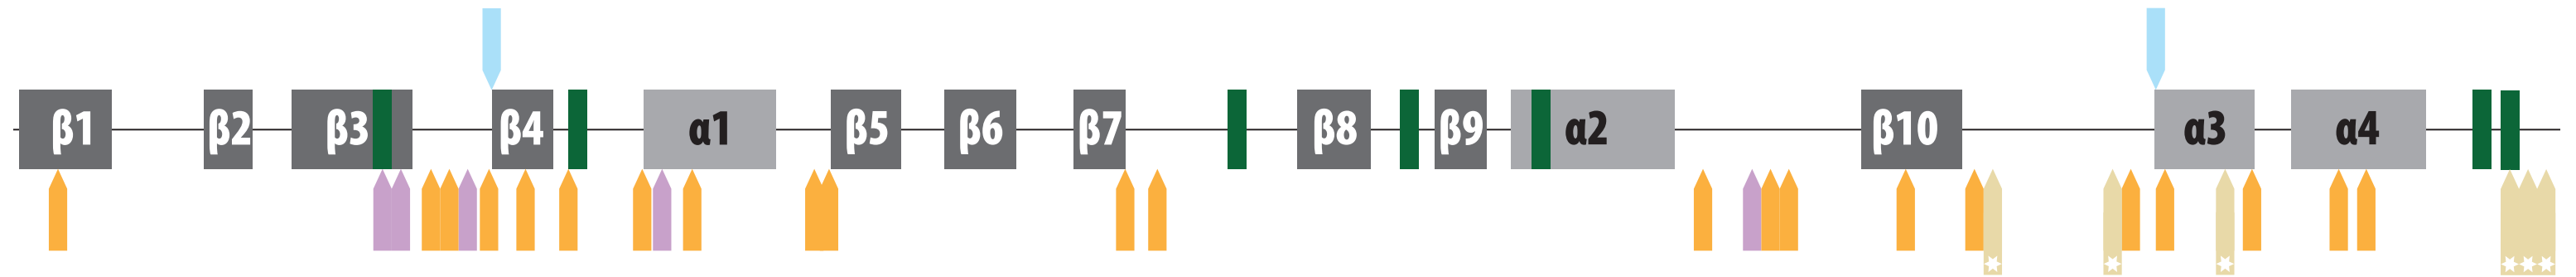

Smad4 MH2

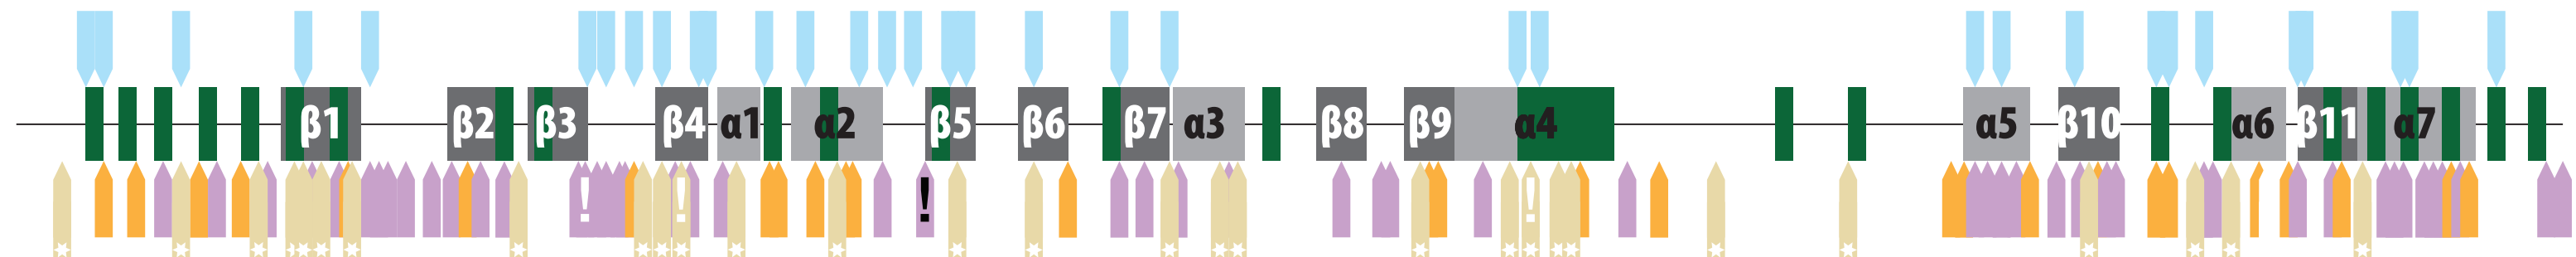

Supplement: NIHMS678802-supplement-3.pdf [file NIHMS678802-supplement-3.pdf]
