# Supplementary material
Source: PubMed Central journal article supplement (PMC4485443)

# Smad1

Degradation: Smurf1  
Human to vertebrate differences

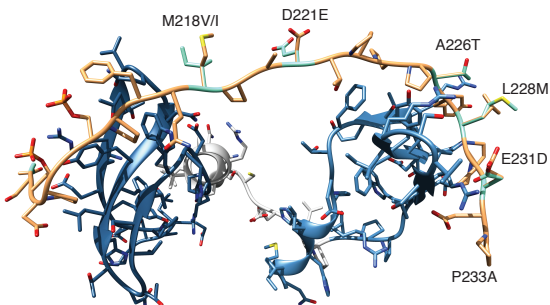

Human polymorphisms

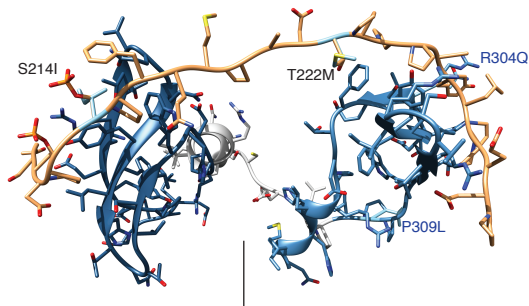

S271L, G277R, Q288\* (long isoform)

Tumor mutations

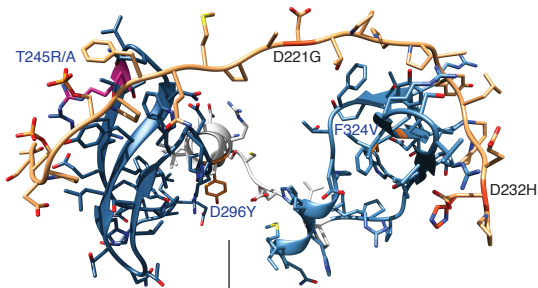

E284K, F285L (long isoform)

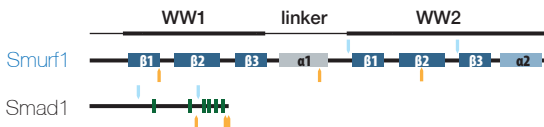

Supplement: NIHMS678802-supplement-5.pdf [file NIHMS678802-supplement-5.pdf]
