# Supplementary material
Source: PubMed Central journal article supplement (PMC4485443)

# Nedd4L WW2 in complex with Smad7

## Human to vertebrate differences

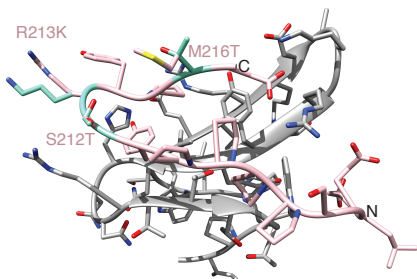

## Human polymorphisms

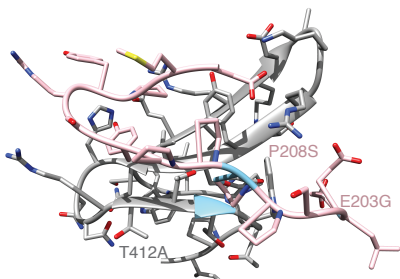

## Tumor mutations

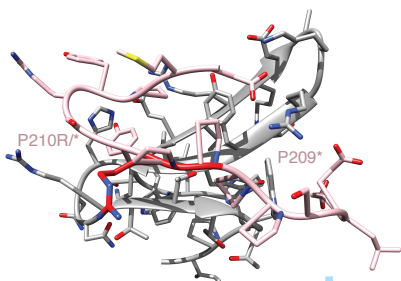

Nedd4L

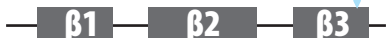

Smad7

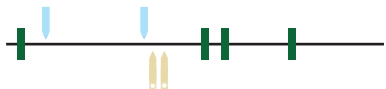

Supplement: NIHMS678802-supplement-7.pdf [file NIHMS678802-supplement-7.pdf]
