# Supplementary material
Source: PubMed Central journal article supplement (PMC4485443)

# Smad1 MH1

## Human to vertebrate differences

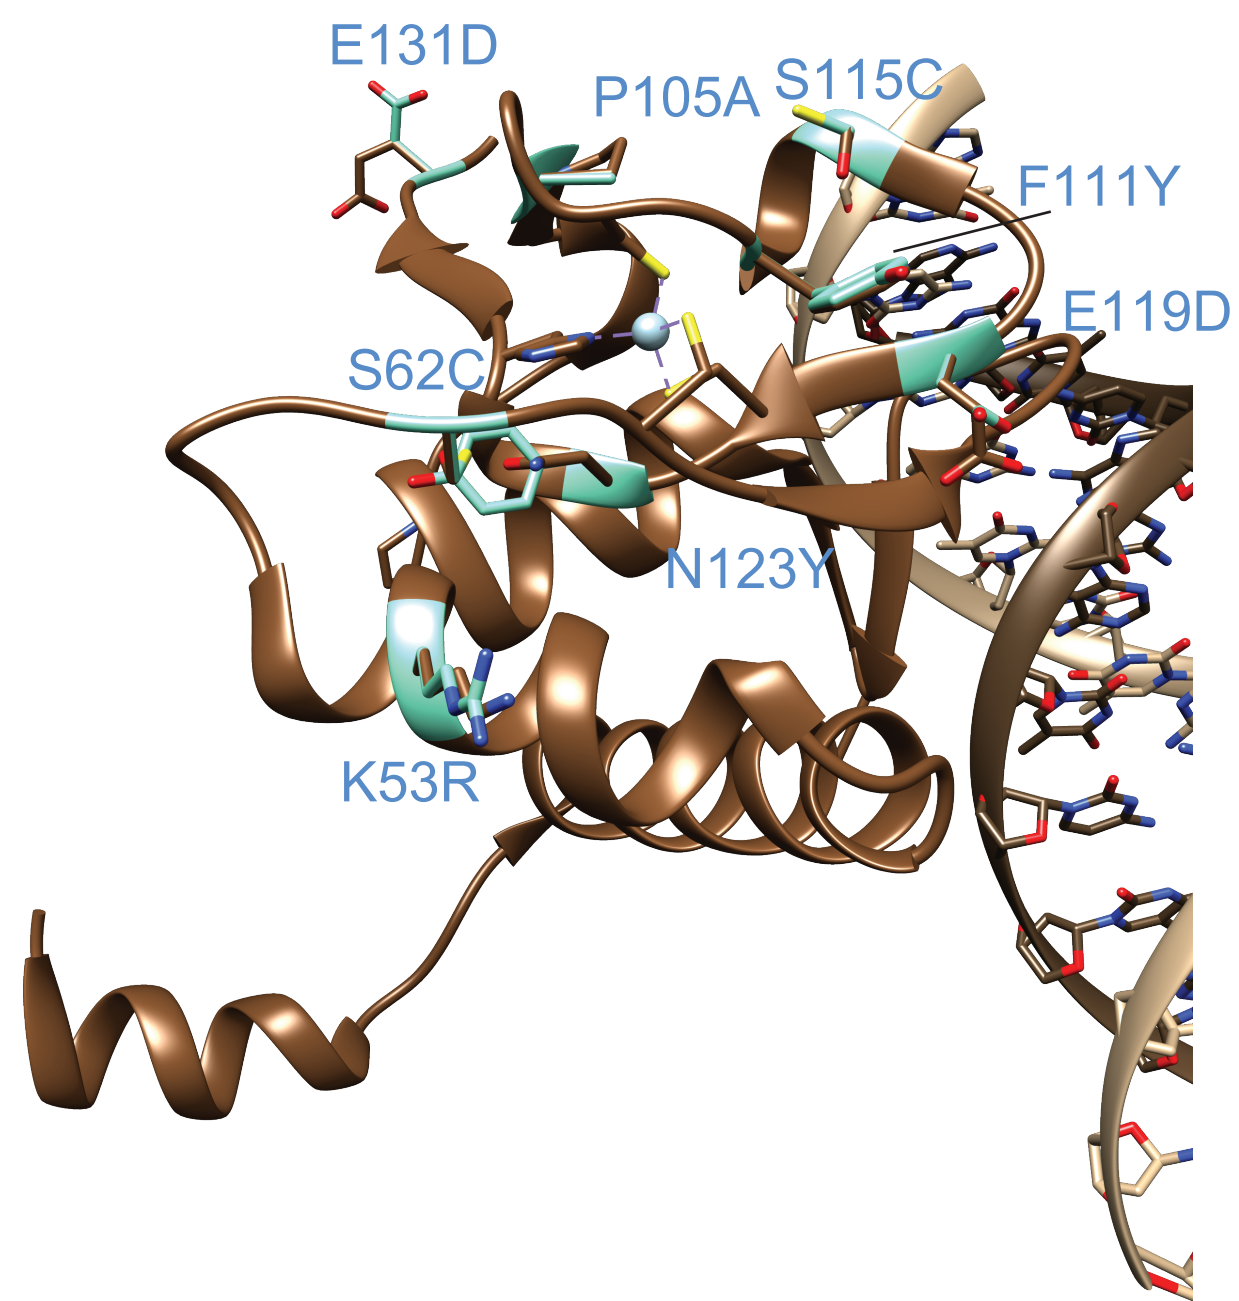

## Human polymorphisms

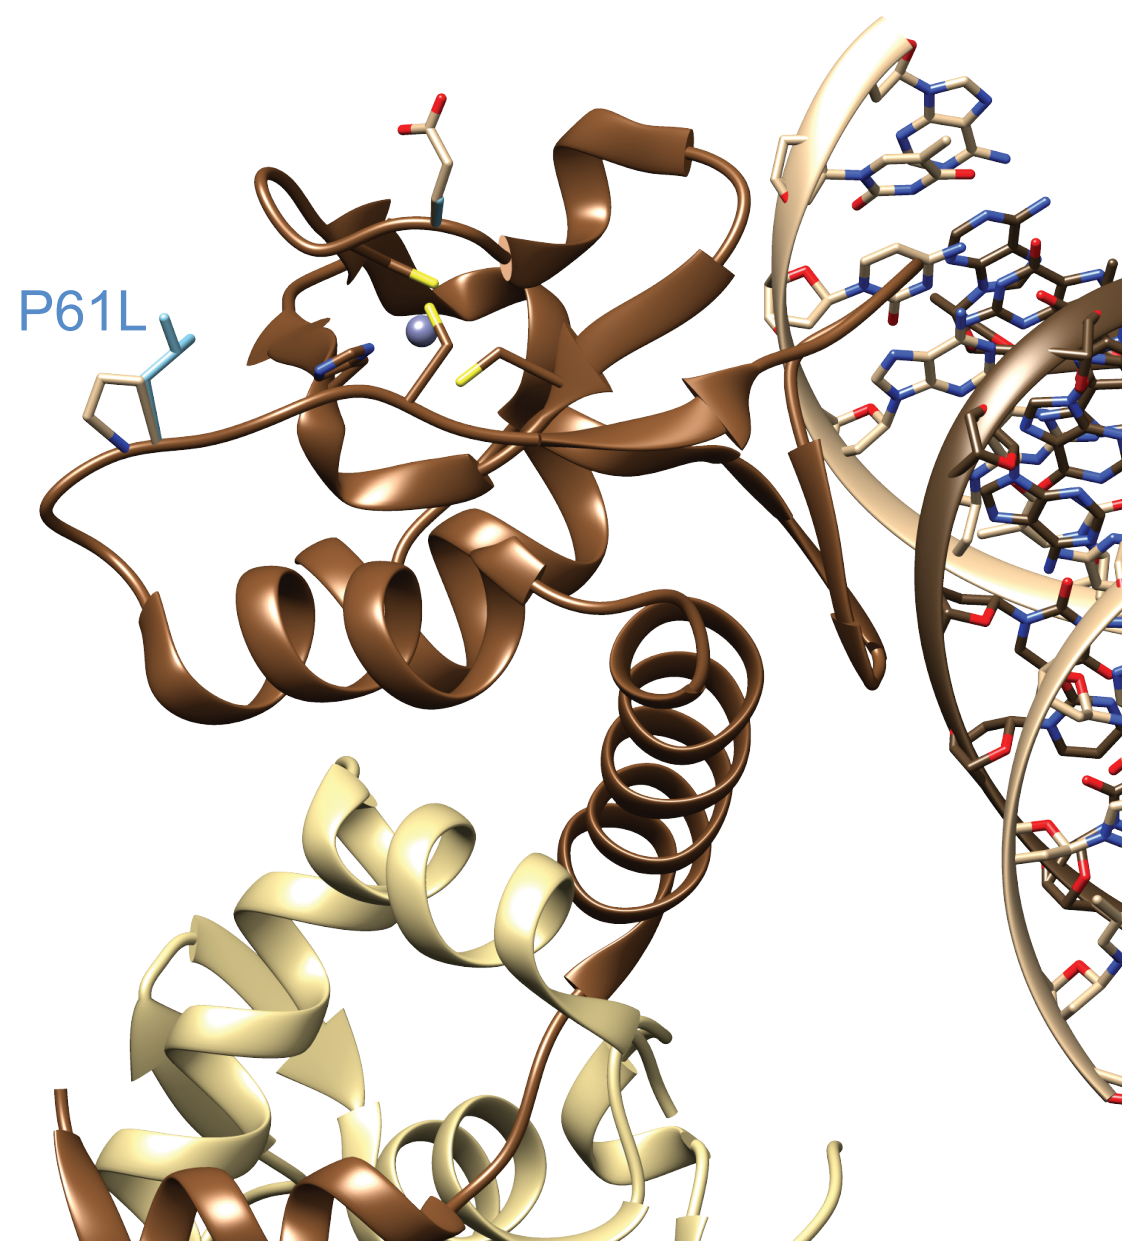

## Tumor mutations

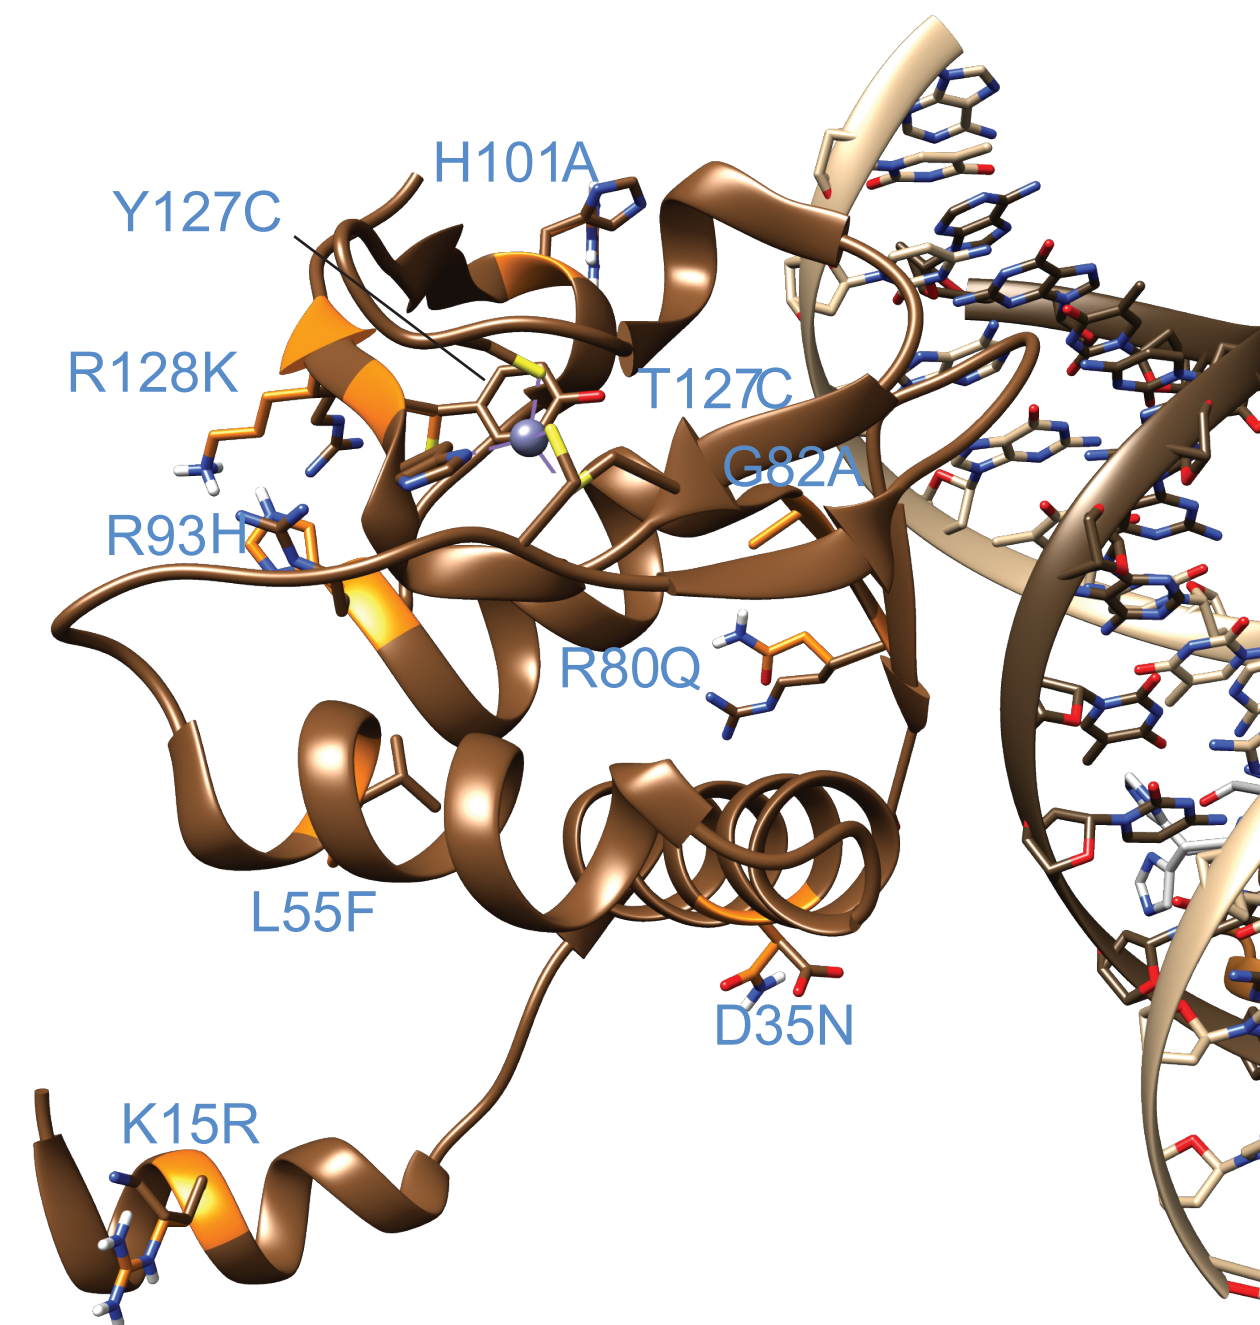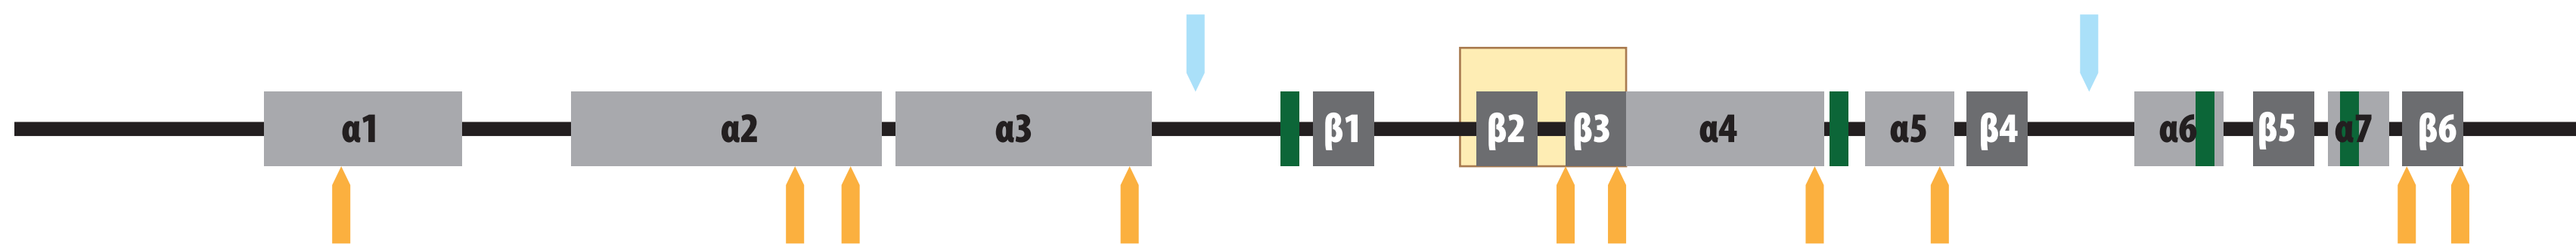

Supplement: NIHMS678802-supplement-1.pdf [file NIHMS678802-supplement-1.pdf]

# Smad3 MH1

## Human to vertebrate differences

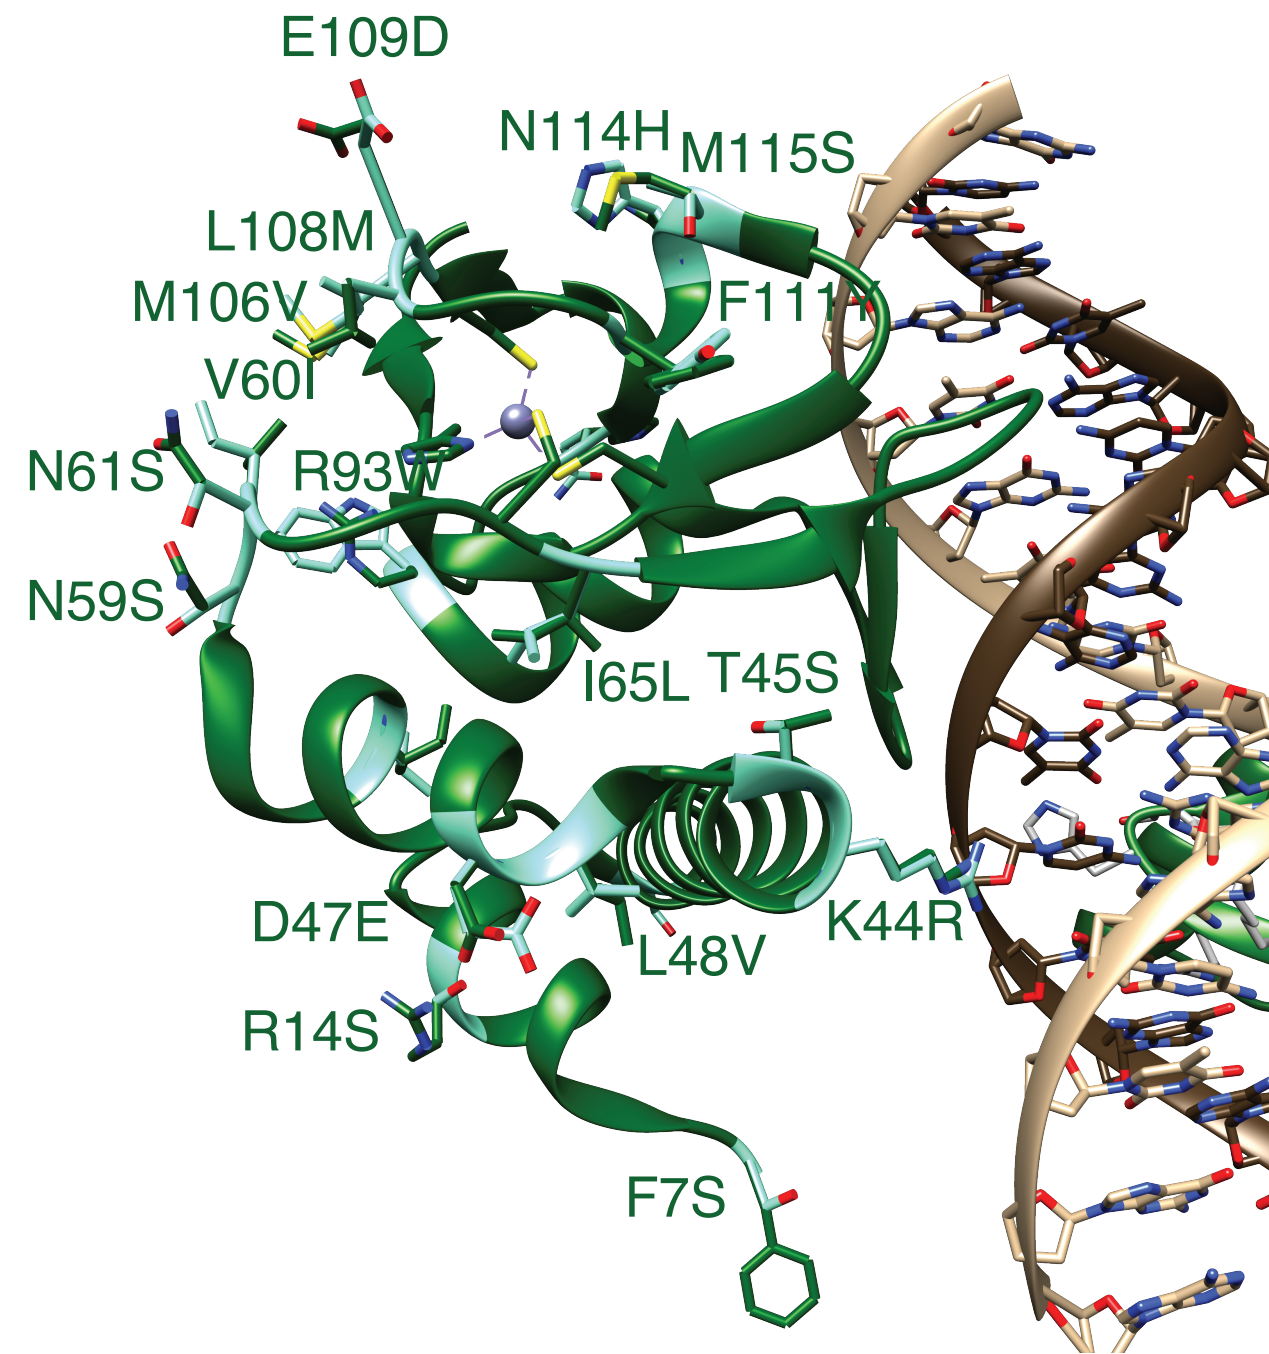

## Human polymorphisms

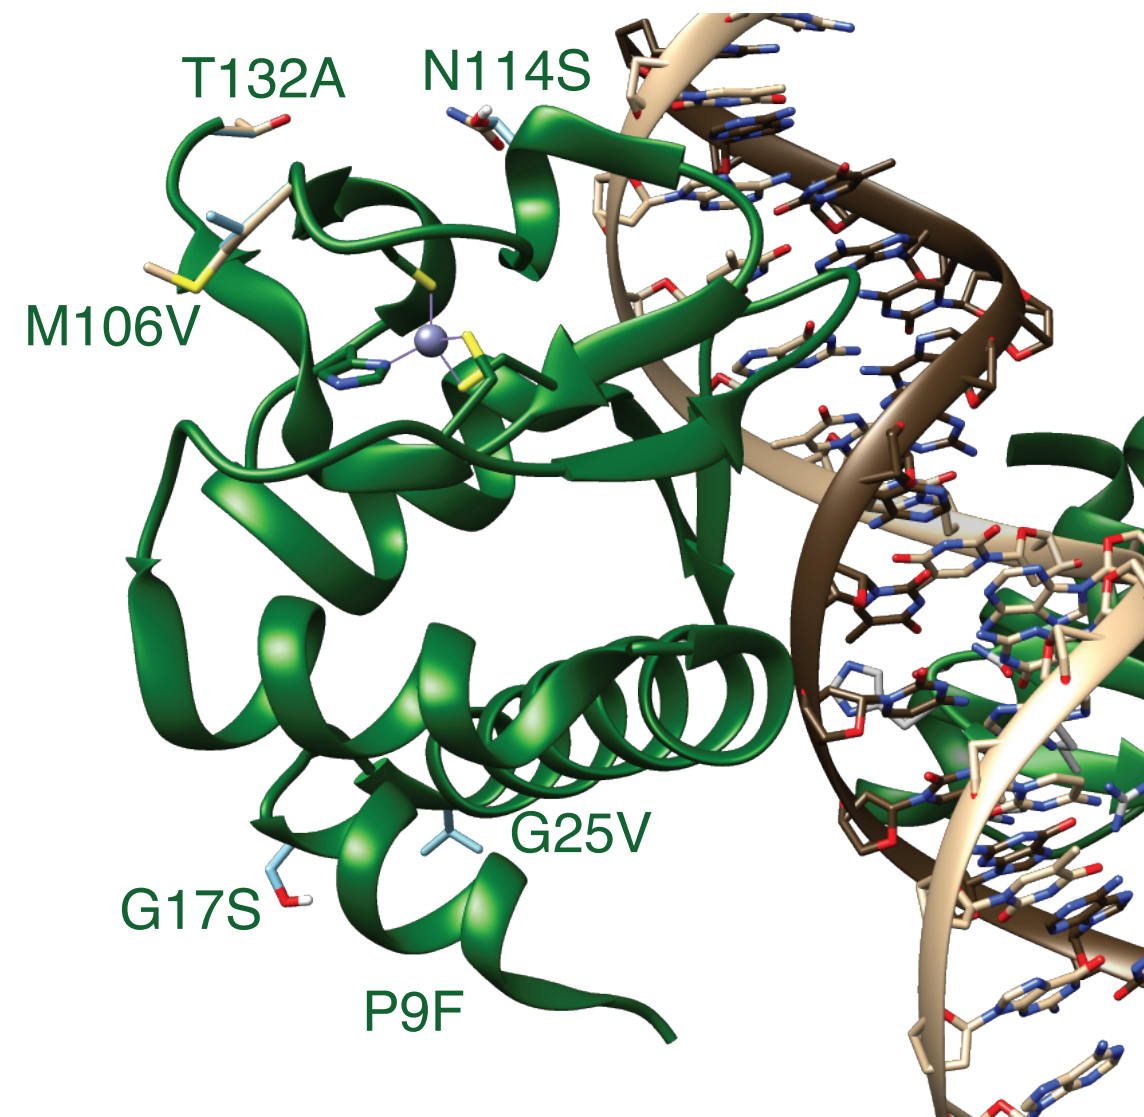

## Tumor mutations

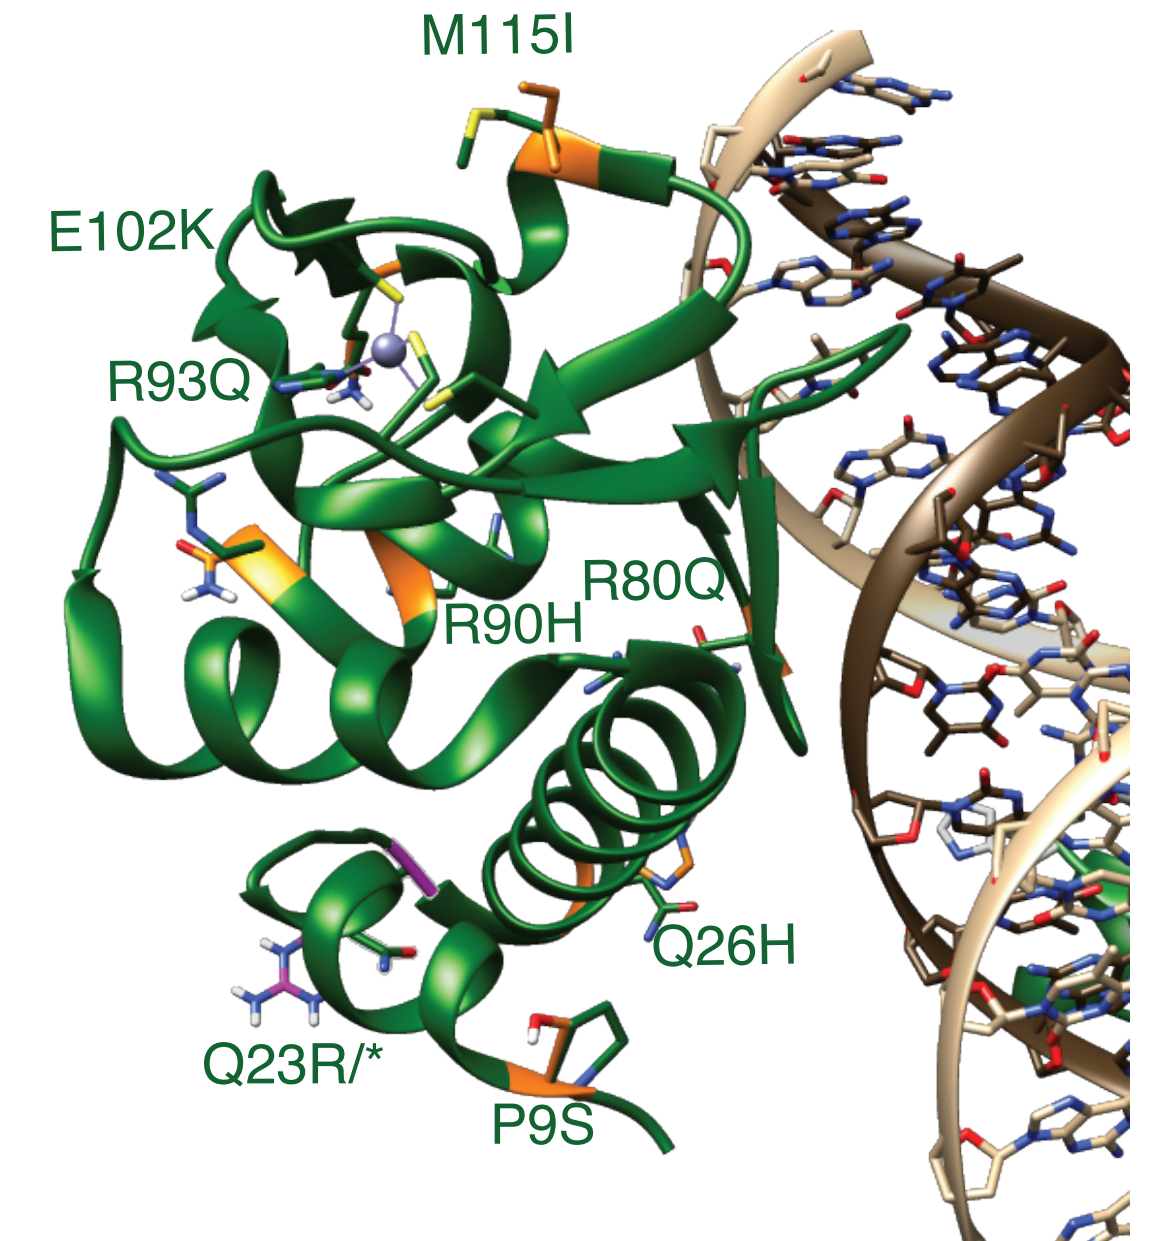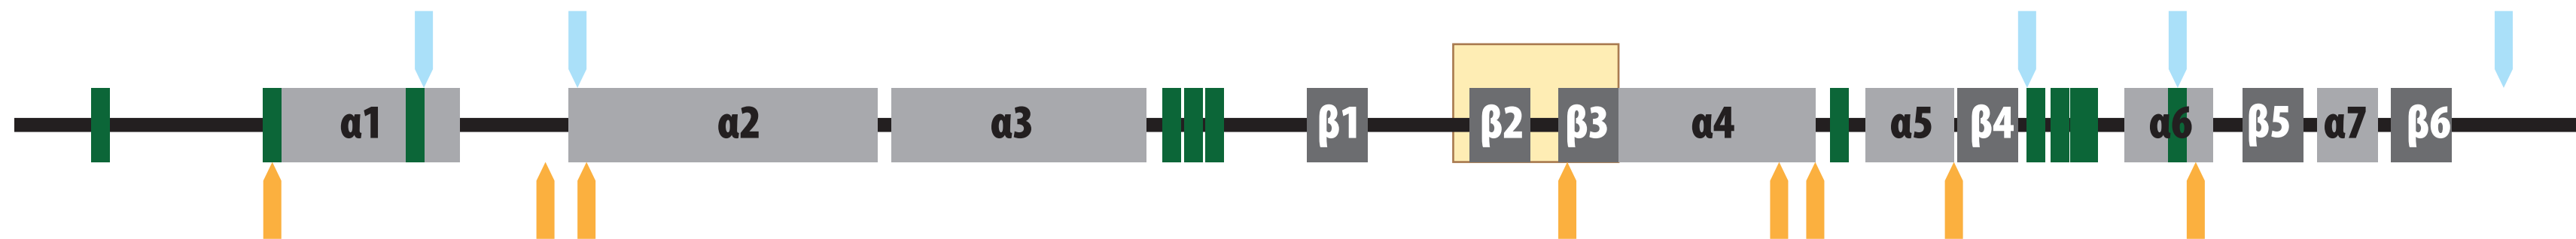

Supplement: NIHMS678802-supplement-2.pdf [file NIHMS678802-supplement-2.pdf]

# Smad1

Activation: YAP1

Human to vertebrate differences

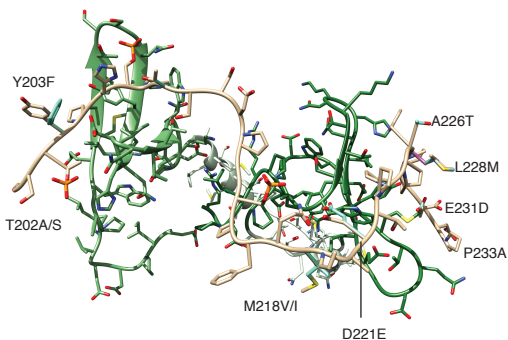

Human polymorphisms

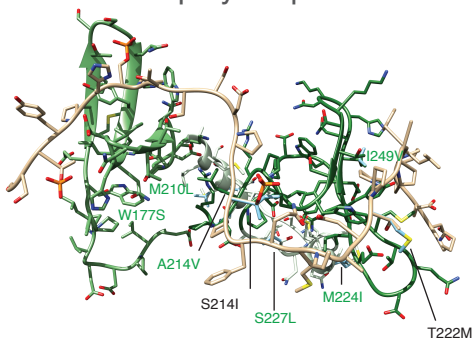

Tumor mutations

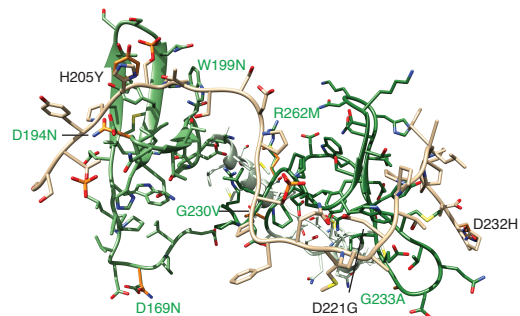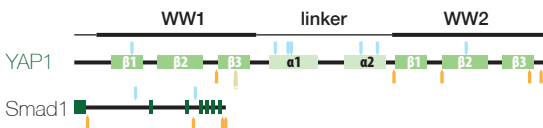

Supplement: NIHMS678802-supplement-4.pdf [file NIHMS678802-supplement-4.pdf]

# Nedd4L in complex with Smad3

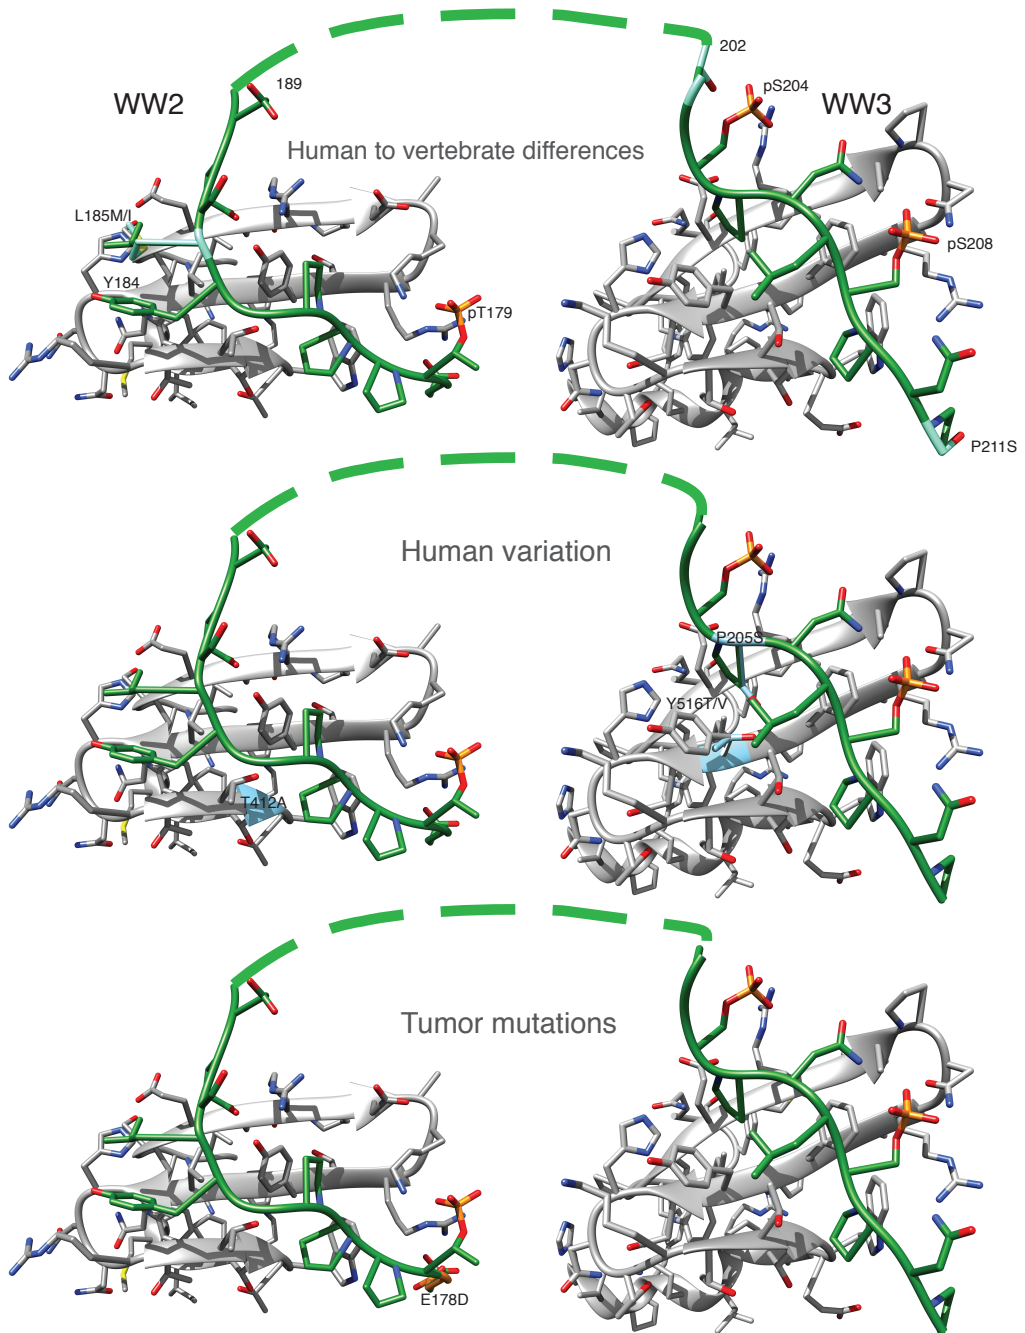

Supplement: NIHMS678802-supplement-6.pdf [file NIHMS678802-supplement-6.pdf]
